# Supplementary material for: A Novel ssDNA Aptamer Targeting Carcinoembryonic Antigen: Selection and Characterization
Source: MDPI journal article supplement (doi:10.3390/biology11101540), 2022-10-20
Supplement: s1 [file s1]

## Supplementary materials

### Methods

Dot blot was used as a rapid analysis of affinity of the pool of aptamers from selected SELEX rounds and served as an alternative method for affinity confirmation. CEA and biotin were applied onto a nitrocellulose membrane (BA85 Protran, 0.45  $\mu\text{m}$ , Whatman, USA) at 45  $\mu\text{g/ml}$  concentration and air dried. The membrane surface was then blocked with Superblock solution for 60 min and washed 3 - 4 times with 1  $\times$  TBS buffer. The membrane was then air dried and biotinylated aptamer pools from the SELEX cycles of 12, 10, and 8 were left to incubate for 30 min. After washing three times with 1  $\times$  TBS the membrane reacted with streptavidin-alkaline phosphatase diluted to 1:500 for 30 min. The membrane was then coated in TMB substrate for 15 min in the dark after washing 3 - 4 times with 1  $\times$  TBS. The results were determined by observation of stained spots on the membrane. Biotin served as a positive control, and deionized water served as a negative control.

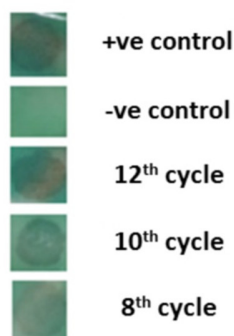

**Figure S1.** Dot blot analysis of affinity binding between aptamer pools from the SELEX cycles of 12, 10, and 8 and target CEA, and two controls: "+" control was biotin (diluted at 1:500), "-" control – deionized water.

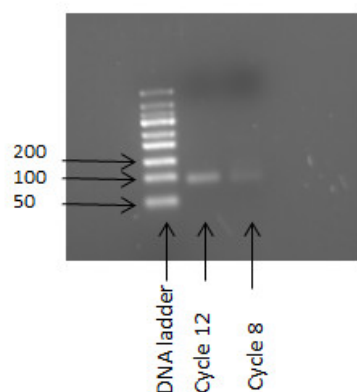

**Figure S2.** 3 % agarose gel of SELEX rounds 12 and 8 products corresponding to 90 bp.

**Table S1.** The absorbance measurement of SELEX products.

|              |              |                |            |
|--------------|--------------|----------------|------------|
| Round 8 DNA  | A260 = 0.228 | A260/280 = 1.9 | 11.4 ng/uL |
| Round 12 DNA | A260 = 0.260 | A260/280 = 1.8 | 13 ng/uL   |
